# Supplementary material for: High-level expression by tissue/cancer-specific promoter with strict specificity using a single-adenoviral vector
Source: PubMed Central journal article supplement — Nucleic Acids Res. 2010 Nov 4;39(2):e7. doi: 10.1093/nar/gkq966 (PMC3025582; doi:10.1093/nar/gkq966), 2010-11-04
Supplement: supp_gkq966_R-Supplement1_Y_Kanegae.pdf [file supp_gkq966_R-Supplement1_Y_Kanegae.pdf]

## Supporting Material Figure 1

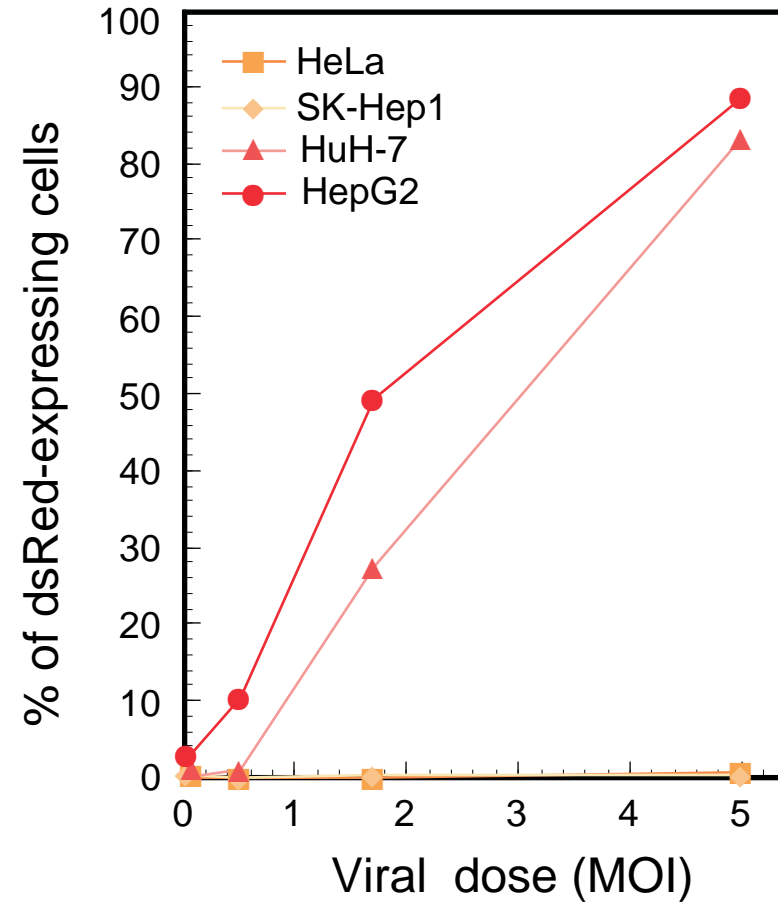

Dose responses of FACS analysis for dsRed expressing cells infected with the double-unit virus containing AFP promoter.

The percentages of dsRed-expressing cells (HuH-7 and HepG2) were high in all MOIs, while the percentages of those (HeLa and SK-Hep1) were very low.
